# Supplementary material for: Identification, Synthesis, Conformation and Activity of an Insulin-like Peptide from a Sea Anemone
Source: MDPI journal article supplement (doi:10.3390/biom11121785), 2021-11-29
Supplement: s1 [file s1]

## *Supplementary Information*

# **Identification, synthesis, conformation and activity of an insulin-like peptide from a sea anemone**

**Michela L. Mitchell** <sup>1,2,3\*</sup>, **Mohammed Akhter Hossain** <sup>4,5</sup>, **Feng Lin** <sup>4</sup>, **Ernesto L. Pinheiro-Junior** <sup>6</sup>, **Steve Peigneur** <sup>6</sup>, **Dorothy C. C. Wai** <sup>1</sup>, **Carlie Delaine** <sup>7</sup>, **Andrew J. Blyth** <sup>7</sup>, **Briony E. Forbes** <sup>7</sup>, **Jan Tytgat** <sup>6</sup>, **John D. Wade** <sup>4,5</sup> and **Raymond S. Norton** <sup>1,8\*</sup>

1 Medicinal Chemistry, Monash Institute of Pharmaceutical Sciences, Monash University, 381 Royal Parade, Parkville, Victoria, 3052, Australia; michela.mitchell@qm.qld.gov.au; dorothy.wai@monash.edu; ray.norton@monash.edu

2 Sciences Department, Museum Victoria, G.P.O. Box 666, Melbourne, Victoria, 3001, Australia

3 Queensland Museum, PO Box 3000, South Brisbane 4101, Queensland, Australia;

4 Florey Institute of Neuroscience and Mental Health, University of Melbourne, Parkville, Victoria 3010, Australia; akhter.hossain@unimelb.edu.au; feng.lin@florey.edu.au; john.wade@florey.edu.au

5 School of Chemistry, University of Melbourne, Parkville, Victoria 3010, Australia;

6 Toxicology and Pharmacology, University of Leuven, O&N 2, Herestraat 49, PO Box 922, 3000, Leuven, Belgium; ernesto.lopes@kuleuven.be; steve.peigneur@kuleuven.be; jan.tytgat@kuleuven.be

7 Flinders Health and Medical Research Institute, Flinders University, Bedford Park, South Australia 5042, Australia.; carlie.delaine@flinders.edu.au; andrew.blyth@flinders.edu.au; briony.forbes@flinders.edu.au

8 ARC Centre for Fragment-Based Design, Monash University, Parkville, Victoria 3052, Australia

\* Correspondence: ray.norton@monash.edu (RSN); michela.mitchell@qm.qld.gov.au (MLM)

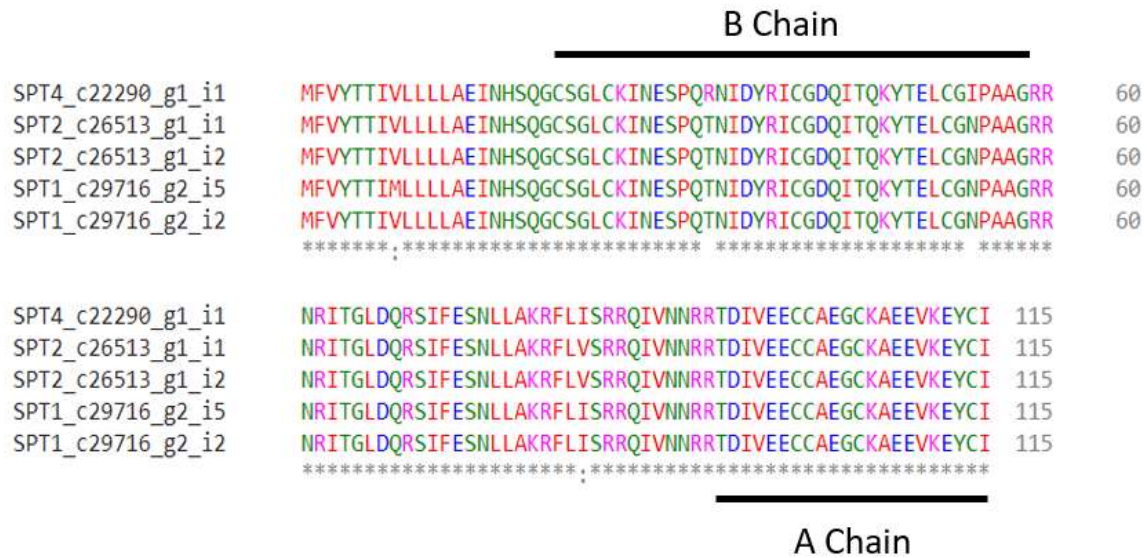

**Figure S1.** Alignment of full-length translated insulin-like peptide (ILP) sequences from the tentacle transcriptomes of three individuals of the sea anemone *Oulactis* sp. The gene is highly conserved across individuals of the species, particularly in the A chain. Sequences were deposited in the European Nucleotide Archive (EMBL-ENA) database under Project No. PRJEB34263 (Acc. No. LR700308–11). Sequence alignment was conducted in Clustal Omega (<https://www.ebi.ac.uk/Tools/msa/clustalo/>) [1–3]

```

Stylophora_pistillata_(PFX24051.1)
Pocillopora_damicornis_(RMX49271.1)
Acropora_millepora_(XP_029199002.1)
Nematostella_vectensis_(XP_032220951.1)
Exaiptasia_pallida_(KXJ12931.1)
Actinia_tenebrosa_(XP_031575451.1)
Oulactis_sp_(Il01_i1)

```

**Figure S2.** Sequence alignment of top six species hits from NCBI Blastp of insulin-like\_Oulsp\_1\_i1 (ILO1\_i1) from *Oulactis* sp. E-value threshold 1e-10. Alignment shows high sequence similarity and conservation of the A chain, very low similarity in the B Chain with many of the sequences lacking obvious cleavage sites for the B and C chains. Sequence alignment was performed in Clustal Omega (<https://www.ebi.ac.uk/Tools/msa/clustalo/>) [1–3].

```

Tentacle_ILP_Oulsp_3_i1      MGSFSRCFLPILIFLLFLVCLTL---ARP--KGRGRKMYKIRETGGKAVSFVCGDYTY      54
Tentacle_ILP_Oulsp_8_i1      --MFSEKSLHVL-RVFLVLCL-LLHLVSAT--CNSKGQCWKTSEAPNKSVDFHLCGSMIP      54
Frill_Acror_ILP_Oulsp_9_i1    --MFSEKSLNVL-RVLLVLCL-LLHLVSAT--CNSKGQCWKTSEAPNKSVDFHLCGSMIP      54
Tentacle_ILP_Oulsp_4_i1      --MFSEKSLNVL-RVLLVLCL-LLHLVSAT--CNSKGQCWKTSEAPNKSVDFHLCGSMIP      54
Frill_Acror_ILP_Oulsp_10_i1   ---MDICVKTL-RLAFVLTAFSVALSQN--CLMRGGCHKVEESSRSQVDFFLCGDSIY      53
Tentacle_ILP_Oulsp_6_i1      ---MDICVKTL-RLAFVLTAFSVALSQN--CLMRGGCHKVEESSRSQVDFFLCGDSIY      53
Tentacle_ILP_Oulsp_7_i1      ---MDICVKTL-QLAFLLTAFSVALSQN--CLMRGGCHKVEESSRSQVDFFLCGDSIY      53
Tentacle_ILP_Oulsp_5_i1      -----MASRYHTIHALSILLLLVLIYQA-----YHVTSTPKSGKIDKYCGEQFI      43
Tentacle_ILP_Oulsp_5_i2      -----MASRYHTIHALSILLLLVLIYQA-----YHVTSTPKSGKIDKYCGEQFI      43
Tent_IL01_i1                  -----MFVYTTIMLLLLAEINHSQGCGLCKINESPQTINIDYRICGDQIT      45
                                :           : .: .      **

Tentacle_ILP_Oulsp_3_i1      ILFTSICMPRNYK-----RSSIDFLTDERTANDYLSGR---TGVTRRNYNIVEECC      102
Tentacle_ILP_Oulsp_8_i1      FAVRDICNIMMAAYGRRRKQARKSSGTIVYKNPNN---AKR---FRIAKRKFNIVEECC      107
Frill_Acror_ILP_Oulsp_9_i1    FAVRDICNIMMAAYGRRRHKARKSSGTIVYKNPNK---AKR---FRIAKRKFNIVEECC      107
Tentacle_ILP_Oulsp_4_i1      FAVRDICNIMMAAYGRRRHKARKSSGTIVYKNPNN---AKR---FRIAKRKFNIVEECC      107
Frill_Acror_ILP_Oulsp_10_i1   YTFMDVCKIKKRR---KREVKAAVNILVNRKEST---KFL---SRRKRRTYDIVEECC      102
Tentacle_ILP_Oulsp_6_i1      YTFMDVCKIKKRR---KREVKAAVNILVNRKEST---KFL---SRRKRRTYDIVEECC      102
Tentacle_ILP_Oulsp_7_i1      YTFIDVCKIKKRR---KREVKAAVNILVNRRESS---KFL---SRRKRRTYDIVEECC      102
Tentacle_ILP_Oulsp_5_i1      SAWSVCCGNPKC-ENSKRQVQDEDDILTLPFAKRFLLSRRQLSSINKRGSTDAVEECC      102
Tentacle_ILP_Oulsp_5_i2      SAWSVCCGNPKC-ENSKRQVQDEDDILTLPFAKRFLLSRRQLSSINKRGSTDAVEECC      102
Tent_IL01_i1                  QKYTELCGNPAAG-RRNRITGLDQRSIFESNLLAKRFLISRQIVN---NRRTDIVEECC      101
                                *           . :           . : *****

Tentacle_ILP_Oulsp_3_i1      LEGCWVEEVKEYCK---      116
Tentacle_ILP_Oulsp_8_i1      TEGCLVEEVREYC---      120
Frill_Acror_ILP_Oulsp_9_i1    TEGCIVEEVREYC---      120
Tentacle_ILP_Oulsp_4_i1      TEGCIVEEVREYC---      120
Frill_Acror_ILP_Oulsp_10_i1   HEGCRVEEVHEYCYVML      119
Tentacle_ILP_Oulsp_6_i1      HEGCRVEEVHEYCYVML      119
Tentacle_ILP_Oulsp_7_i1      HEGCRVEEVHEYCYVML      119
Tentacle_ILP_Oulsp_5_i1      NEGCSLSEIAEYQC---      116
Tentacle_ILP_Oulsp_5_i2      NEGCSLSEIAEYQC---      116
Tent_IL01_i1                  AEGCKAEVKEYCI---      115
                                *** .*: **

```

**Figure S3.** Sequence alignment of ILPs from five individuals of *Oulactis* sp. from two discrete morphological tissue regions: tentacles; frill and acrorhagi. The mesenterial filaments and gametic material bioinformatic analysis returned fragmented ILP sequences, which were excluded for subsequent analysis. Sequence alignment was conducted in Clustal Omega (<https://www.ebi.ac.uk/Tools/msa/clustalo/>) [1–3]. Sequences were deposited in European Bioinformatics Institute - European Nucleotide Archive (EMBL-ENA) database under Project No. PRJEB34263 (Acc. No. OU729069-77).

A

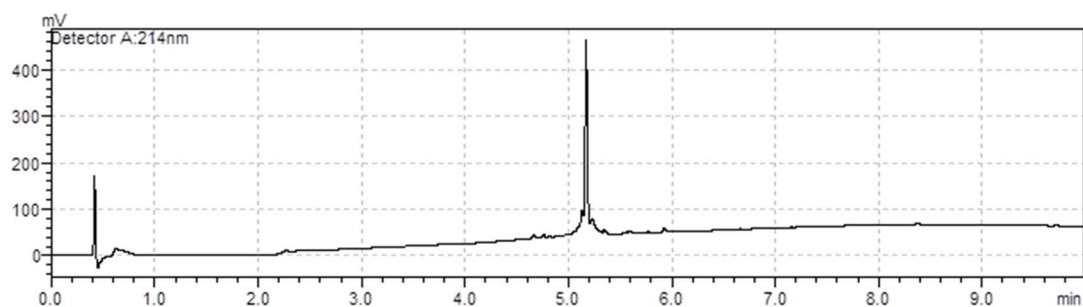

B

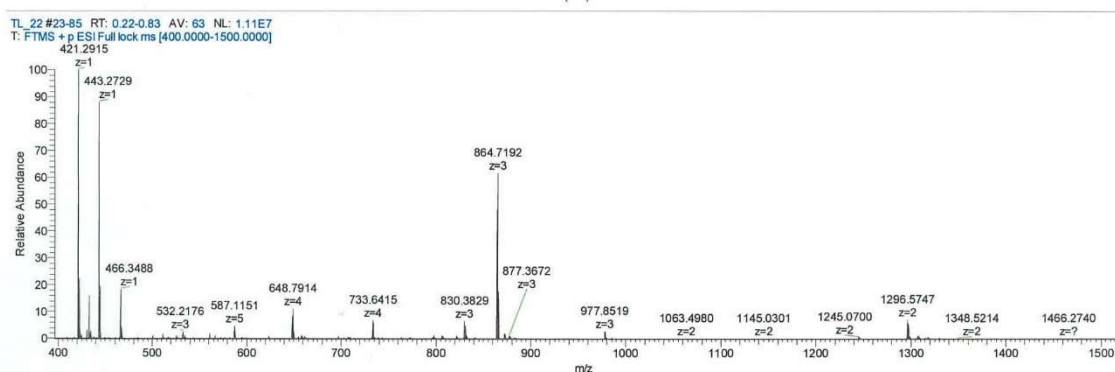

**Figure S4.** Synthetic sea anemone insulin-like peptide [Cys7,12 (S-thiol), Cys8(But), Cys21(Acm)] A-chain. (A) Analytical RP-HPLC. Column: Shimadzu Shim-Pack C18 (3.0 x 75 mm). Buffer A: 0.1% aqueous TFA; Buffer B: 0.1% TFA in CH<sub>3</sub>CN. Gradient: 0-90%B in 10 mins. Wavelength: 214 nm. Flow rate: 1.2 ml/min. Column temperature: 55°C. (B) ESI mass spectrometry. Calcd. [MH<sup>+</sup>] 2591.77, found [M/2+H]=1296.57, [M/3+H]=864.72).

A

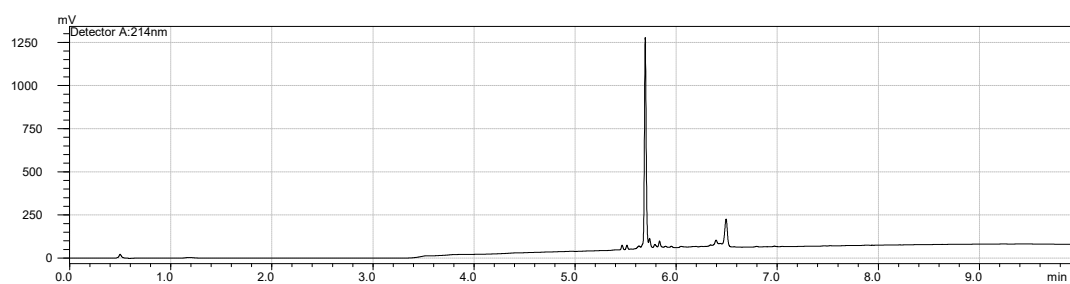

**Figure S5.** Synthetic sea anemone insulin-like peptide [Cys7,12 (S-S), Cys8(But), Cys21(Acm)]-A-chain. (A) Analytical RP-HPLC. Column: Shimadzu Shim-Pack C18 (3.0 × 75 mm). Buffer A: 0.1% aqueous TFA; Buffer B: 0.1% TFA in CH<sub>3</sub>CN. Gradient: 0-90%B in 10 mins. Wavelength: 214 nm. Flow rate: 1.2 ml/min. Column temperature: 55°C.

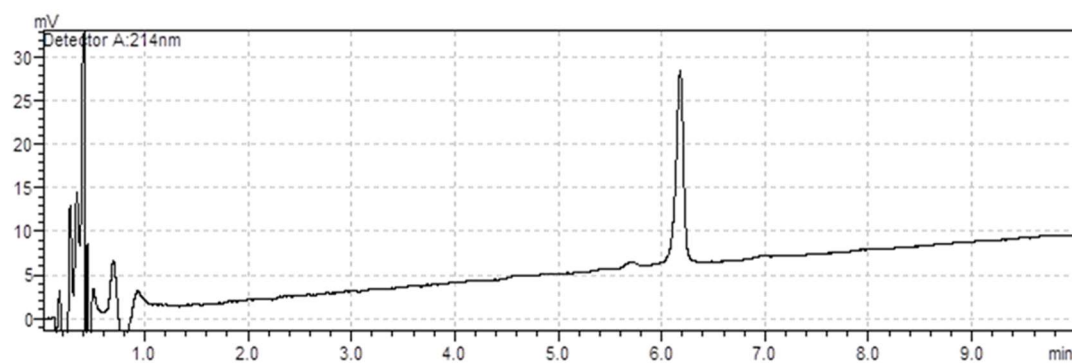

**Figure S6.** Analytical RP-HPLC of sea anemone insulin-like peptide [Cys7,12 (S-S), Cys8(Pyr), Cys21(Acm)] A-chain. Column: Shimadzu Shim-Pack C18 (3.0 x 75 mm). Buffer A: 0.1% aqueous TFA; Buffer B: 0.1% TFA in CH<sub>3</sub>CN. Gradient: 0-90%B in 10 mins. Wavelength: 214 nm. Flow rate: 1.2 ml/min. Column temperature: 55°C.



A

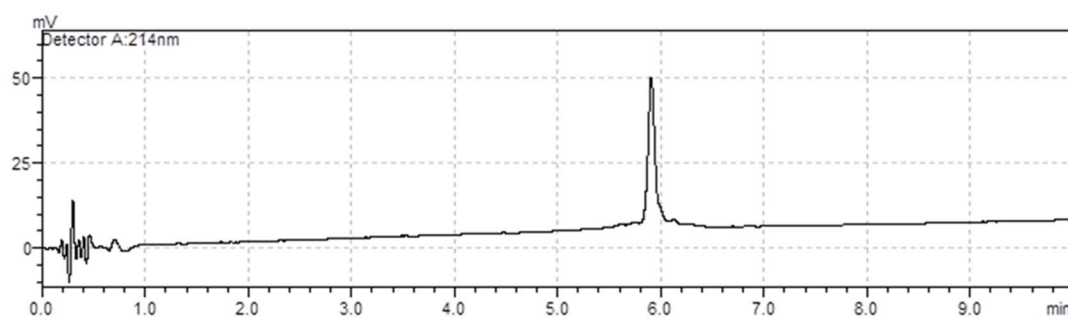

B

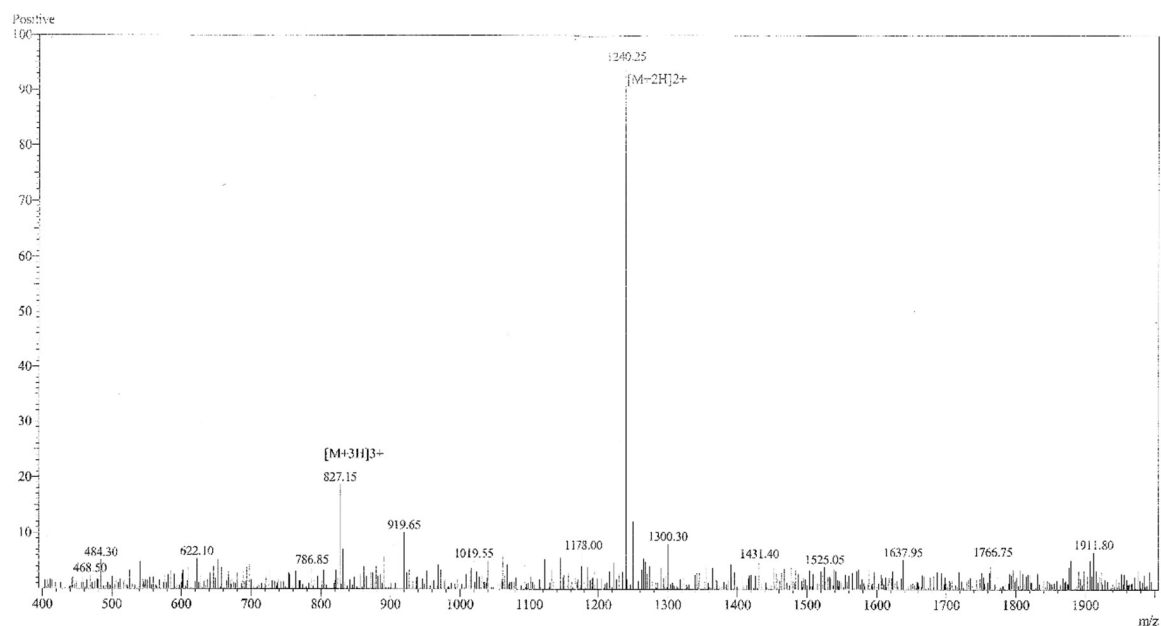

**Figure S7.** Synthetic sea anemone insulin-like peptide [Cys14 (S-thiol), Cys26(Acm)] B-chain. (A) Analytical RP-HPLC. Column: Shimadzu Shim-Pack C18 (3.0 × 75 mm). Buffer A: 0.1% aqueous TFA; Buffer B: 0.1% TFA in  $\text{CH}_3\text{CN}$ . Gradient: 0-90%B in 10 mins. Wavelength: 214 nm. Flow rate: 1.2 ml/min. Column temperature: 55°C. (B) ESI mass spectrometry. Calcd.  $[\text{MH}^+]$  2480.50, found  $[\text{M}/2+\text{H}]=1240.35$ ,  $[\text{M}/3+\text{H}]=827.15$ .



A

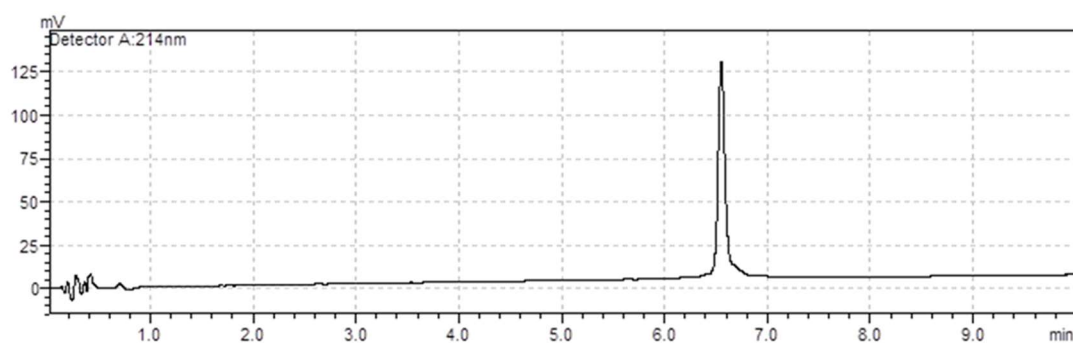

B

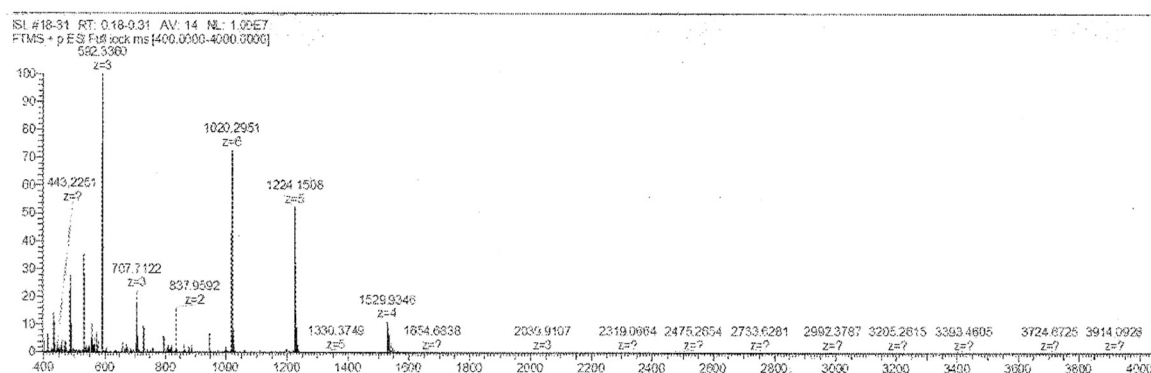

**Figure S8.** Synthetic sea anemone insulin-like peptide [Cys7,12 (S-S), Cys21(Acm)]A-chain/[Cys26(Acm)] B-chain. (A) Analytical RP-HPLC. Column: Shimadzu Shim-Pack C18 (3.0 x 75 mm). Buffer A: 0.1% aqueous TFA; Buffer B: 0.1% TFA in CH<sub>3</sub>CN. Gradient: 0-90%B in 10 mins. Wavelength: 214 nm. Flow rate: 1.2 ml/min. Column temperature: 55°C. (B) ESI mass spectrometry. Calcd. [MH<sup>+</sup>] 6114.62, found [M/4+H]<sup>+</sup>= 1529.93, [M/5+H]<sup>+</sup>=1224.15, [M/6+H]<sup>+</sup>=1020.30, [M/7+H]<sup>+</sup>=1224.15).

A

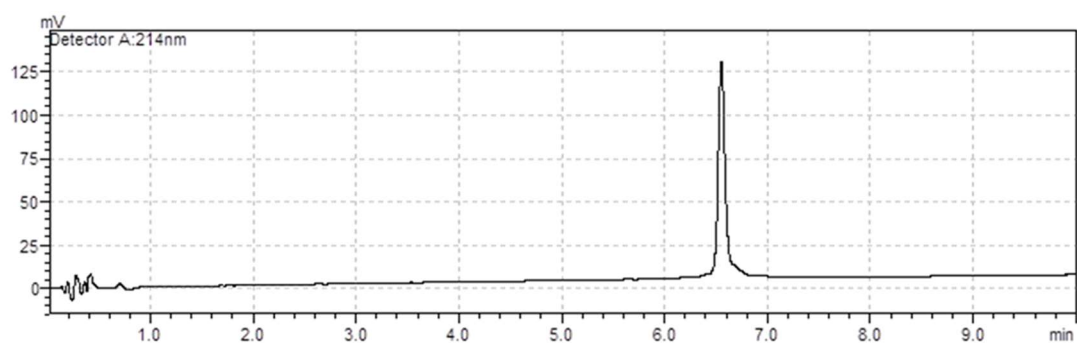

B

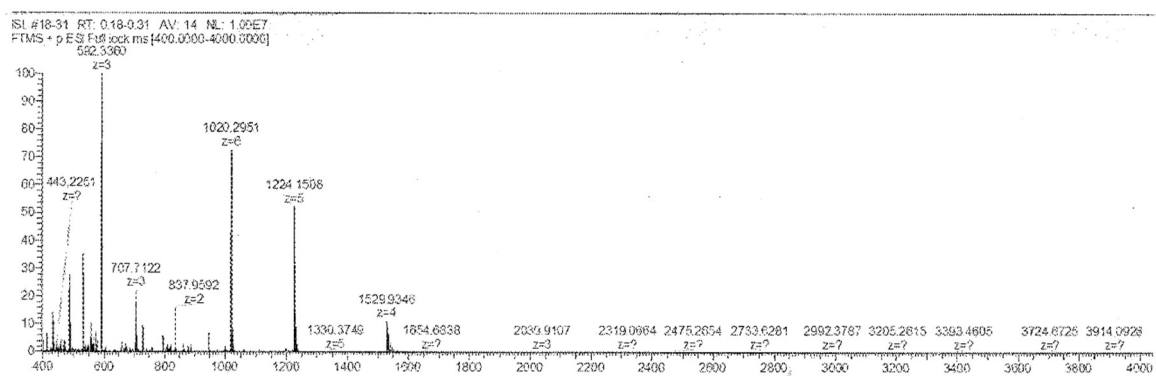

**Figure S9.** Sea anemone insulin-like peptide [Cys7,12 (S-S), Cys21(Acm)]A-chain/[Cys26(Acm)] B-chain. (A) Analytical RP-HPLC. Column: Shimadzu Shim-Pack C18 (3.0 × 75 mm). Buffer A: 0.1% aqueous TFA; Buffer B: 0.1% TFA in CH<sub>3</sub>CN. Gradient: 0-90%B in 10 mins. Wavelength: 214 nm. Flow rate: 1.2 ml/min. Column temperature: 55°C. (B) ESI mass spectrometry. Calcd. [MH<sup>+</sup>] 6114.62, found [M/4+H]=1529.93 [M/5+H]=1224.15, [M/6+H]=1020.30, [M/7+H]=1224.15.

**Table S1.** Top six species hits (NCBI-Blastp) of full-length insulin-like proteins (ILPs) against IIO1\_i1. The translated ILP Insulin-like\_Oulsp\_1\_i1 (IIO1\_i1) from the sea-anemone *Oulactis* sp. was searched against the NCBI-non-redundant database using the online Blastp search function.

| Species                                     | % Identity | E-value |
|---------------------------------------------|------------|---------|
| <i>Actinia tenebrosa</i> (sea-anemone)      | 83         | 2e-61   |
| <i>Acropora millepora</i> (stony coral)     | 38         | 9e-13   |
| <i>Exaiptasia pallida</i> (sea-anemone)     | 37         | 2e-12   |
| <i>Stylophora pistillata</i> (stony coral)  | 37         | 6e-11   |
| <i>Nematostella vectensis</i> (sea-anemone) | 35         | 2e-10   |
| <i>Pocillopora damicornis</i> (stony coral) | 37         | 3e-10   |

## References

1. Sievers, F.; Wilm, A.; Dineen, D.; Gibson, T.J.; Karplus, K.; Li, W.; Lopez, R.; McWilliam, H.; Remmert, M.; Söding, J.; et al. Fast, scalable generation of high-quality protein multiple sequence alignments using Clustal Omega. *Mol. Syst. Biol.* **2011**, *7*, 539, doi:10.1038/msb.2011.75.
2. Goujon, M.; McWilliam, H.; Li, W.; Valentin, F.; Squizzato, S.; Paern, J.; Lopez, R. A new bioinformatics analysis tools framework at EMBL-EBI. *Nucleic Acids Res.* **2010**, *38*, W695–W699, doi:10.1093/nar/gkq313.
3. McWilliam, H.; Li, W.; Uludag, M.; Squizzato, S.; Park, Y.M.; Buso, N.; Cowley, A.P.; Lopez, R. Analysis tool web services from the EMBL-EBI. *Nucleic Acids Res.* **2013**, *41*, W597–W600, doi:10.1093/nar/gkt376.
